# Supplementary material for: Current-Driven SEI and Near-Surface Structural and Chemical Evolution in Lithium Metal Batteries
Source: Research Square preprint supplement (doi:10.21203/rs.3.rs-8264591/v1), 2025-12-24
Supplement: Supplementary file 1 [file 2fe5d29f0cd17e79084ebac7.docx]

Electronic Supplementary Information

**Current-Driven SEI and Near-Surface Structural and Chemical Evolution in Lithium Metal Batteries**

Henrique D. Minami1, Francisco A. Ospina Acevedo1, Jorge M. Seminario1,2,3,* and Perla B Balbuena,1,3,4,*

1Department of Chemical Engineering, Texas A&M University, College Station, TX 77843, USA

2Department of Electrical and Computer Engineering, Texas A&M University, College Station, TX 77843, USA

3Department of Materials Science and Engineering, Texas A&M University, College Station, TX 77843, USA

4Department of Chemistry, Texas A&M University, College Station, TX 77843, USA

*Corresponding authors e-mails: [seminario@tamu.edu](mailto:seminario@tamu.edu); [balbuena@tamu.edu](mailto:balbuena@tamu.edu)


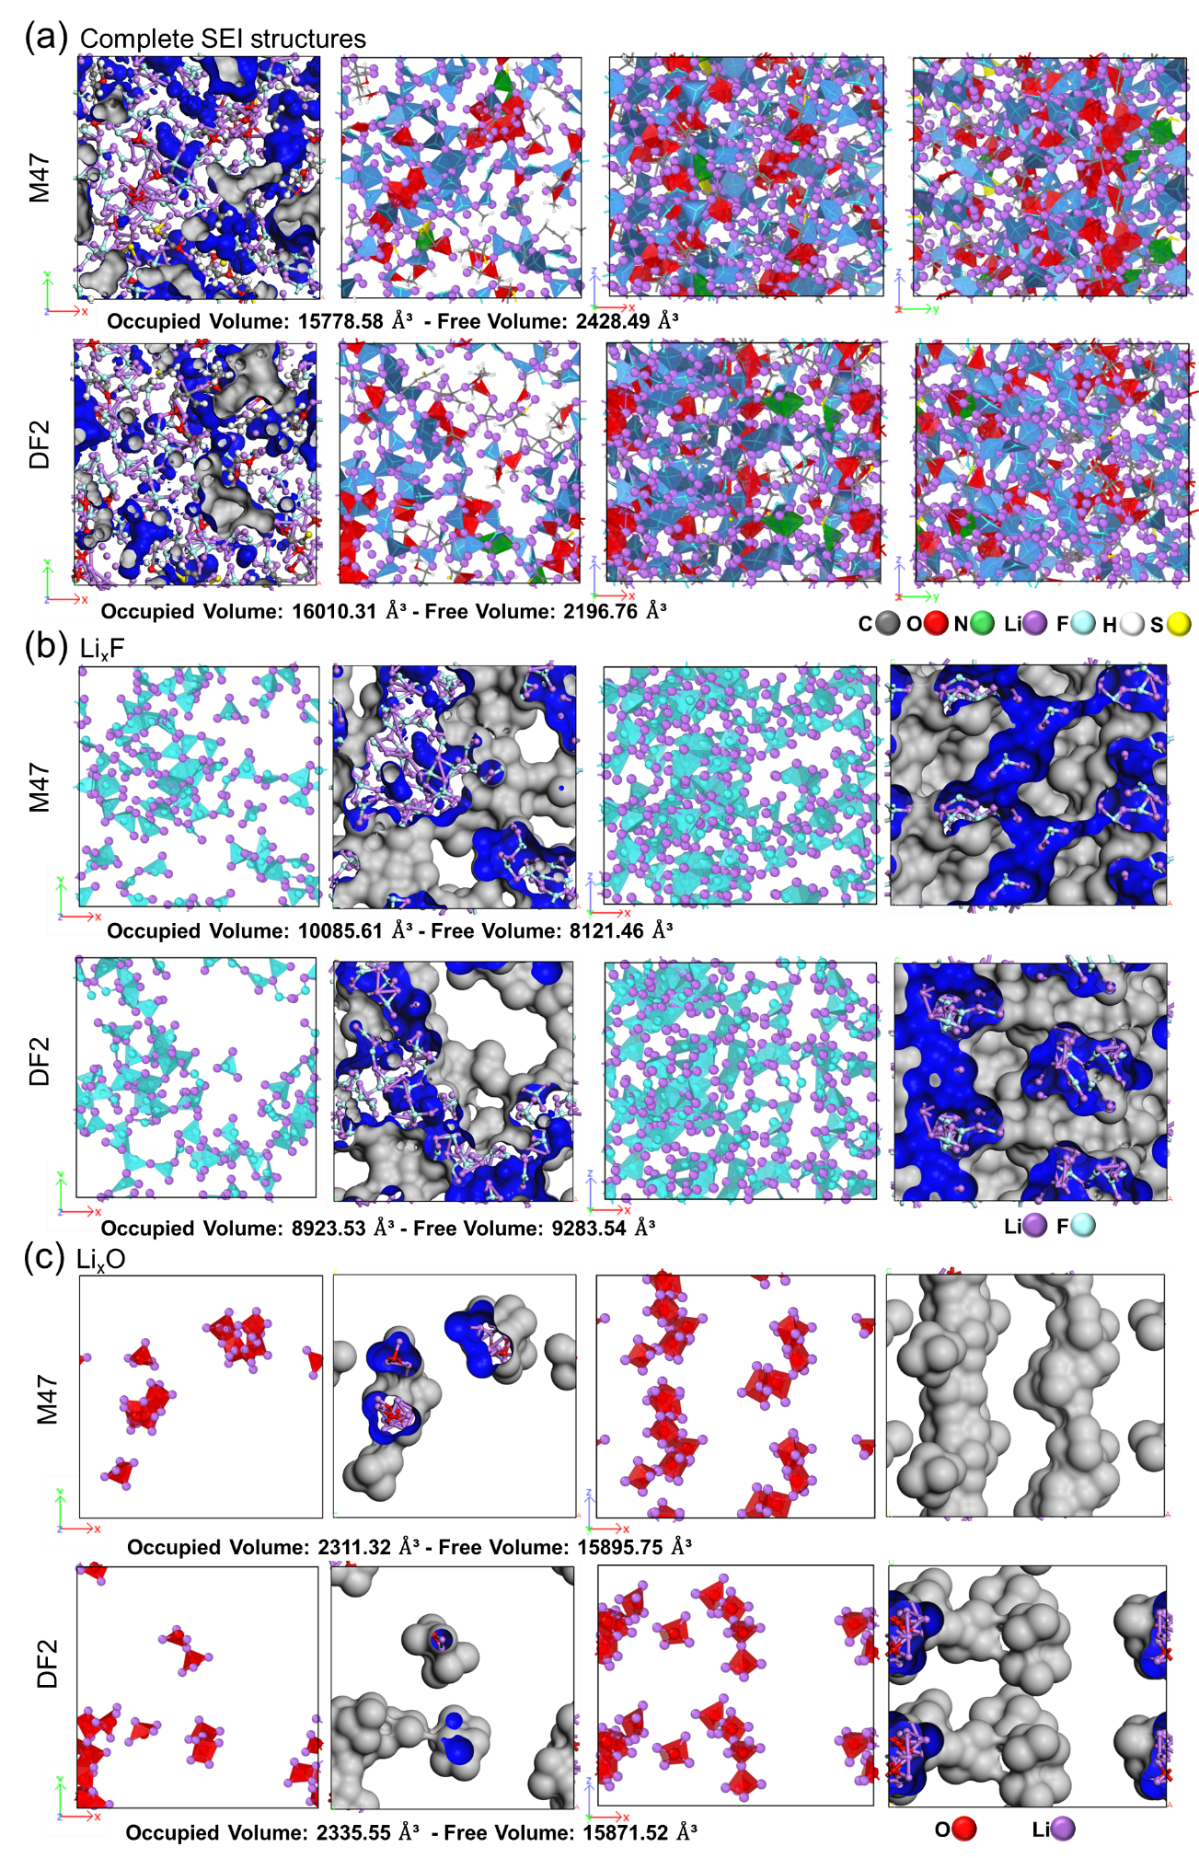


Figure S1. SEI structural characteristics from the M47 and DF2 electrolyte formulations and (a) overall organic and inorganic components distribution; (b) LixF distribution and conformality; and (c) LixO distribution and conformality.

Table S1. Mechanical properties of the SEI structures obtained via the HAIR method

| **Property** | **M47** | **DF2** |
| --- | --- | --- |
| Bulk Modulus [GPa] | 29.830 | 40.683 |
| Shear Modulus 1 [GPa] | 12.017 | 17.249 |
| Shear Modulus 2 [GPa] | 4.668 | 6.915 |
| Poisson Ratio | 0.366 | 0.359 |
| Young's Modulus [GPa] | 31.784 | 45.339 |


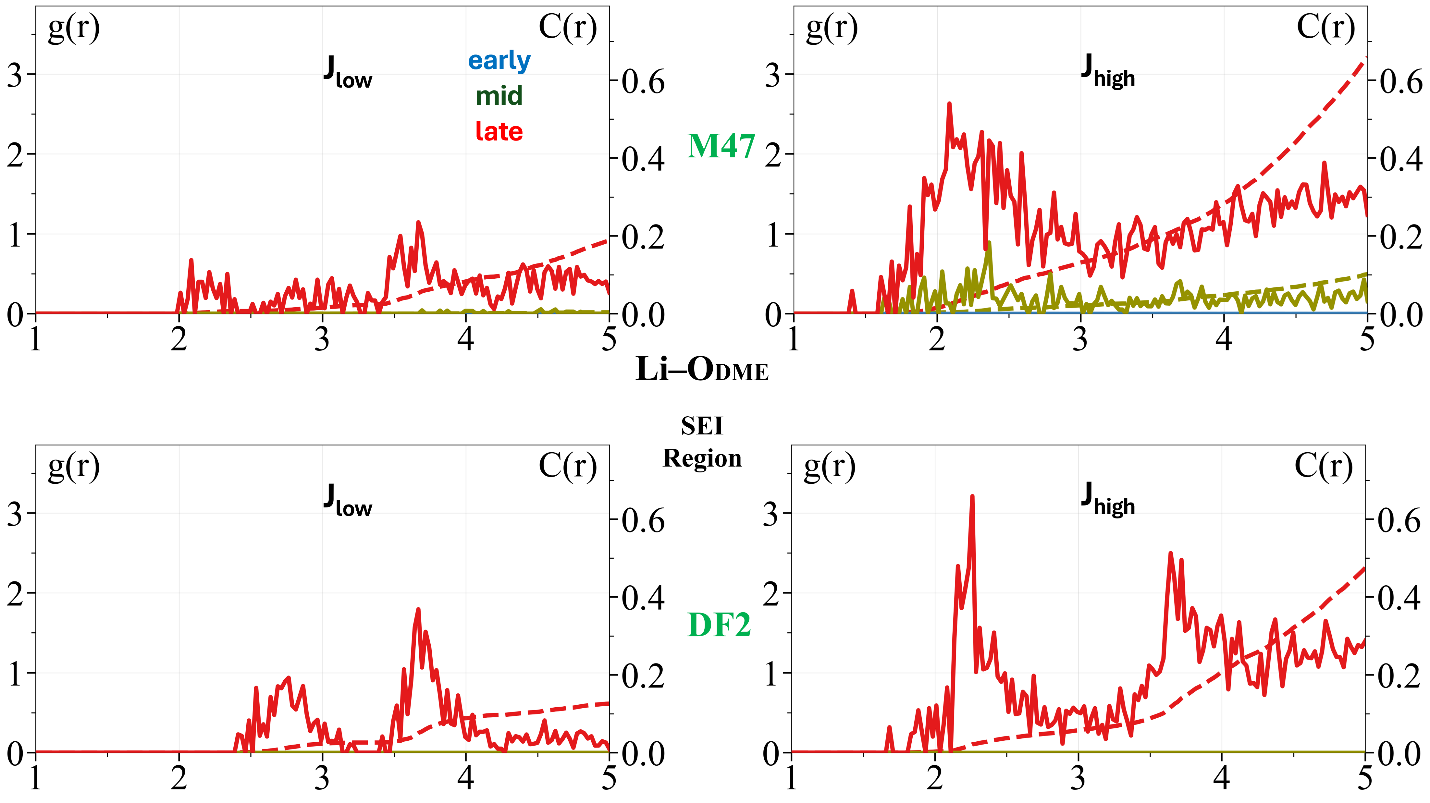


**Figure S2.** and for Li-ODME pairs in the SEI regions for M47 and DF2 electrolytes. Colors correspond to graphs obtained from trajectories based on different simulation times. Color code for time evolution: early: blue; green: intermediate; red: late.


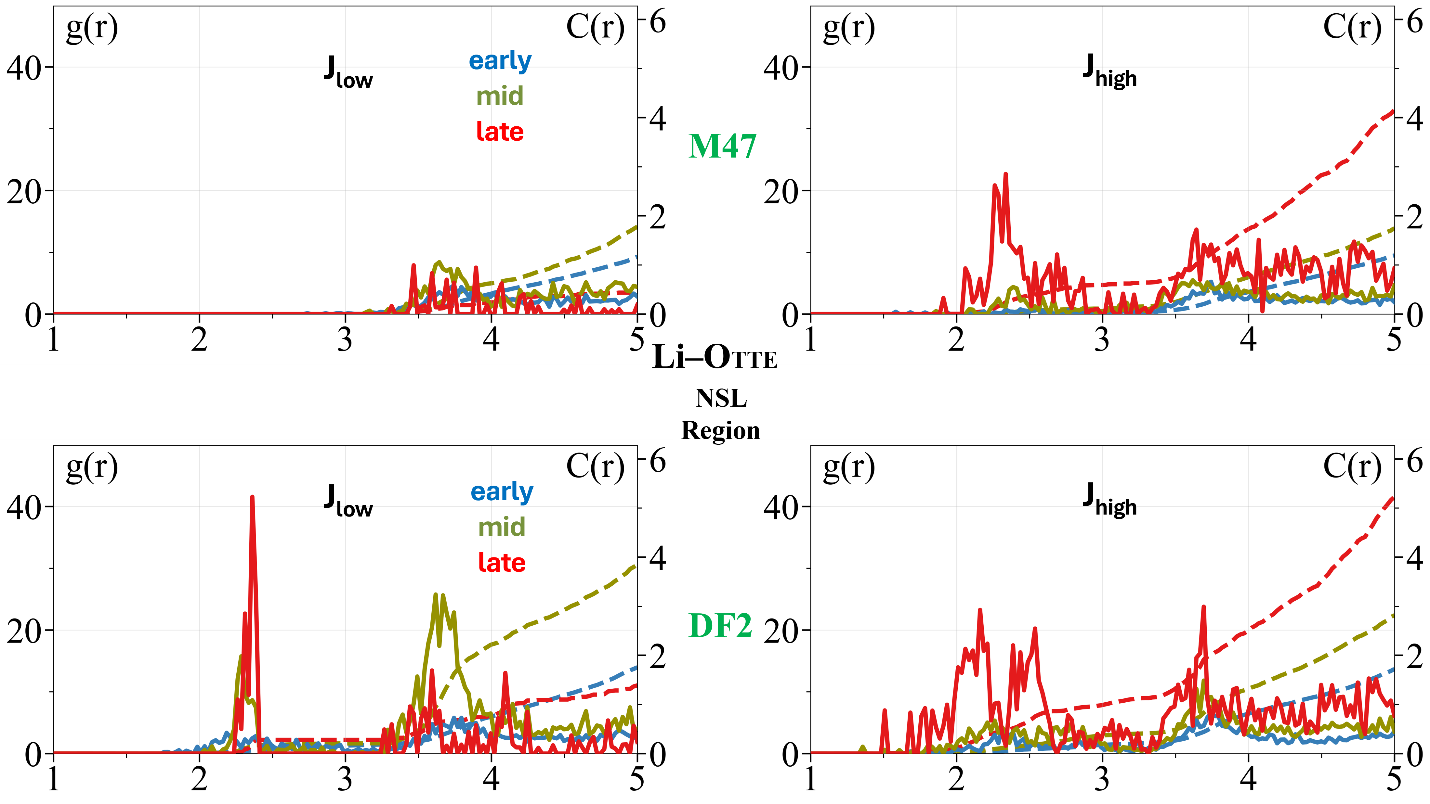


**Figure S3.** and for Li-OTTE pairs in the NSL regions for M47 and DF2 electrolytes. Colors correspond to graphs obtained from trajectories based on different simulation times. Color code for time evolution: early: blue; green: intermediate; red: late.
